# Supplementary figures and images for: Cyclotriphosphazene grafted silica: a novel support for immobilizing the oxo-vanadium Schiff base moieties for hydroxylation of benzene
Source: Royal Society of Chemistry journal article supplement (doi:10.1039/c0cc01941k), 2010-11-26

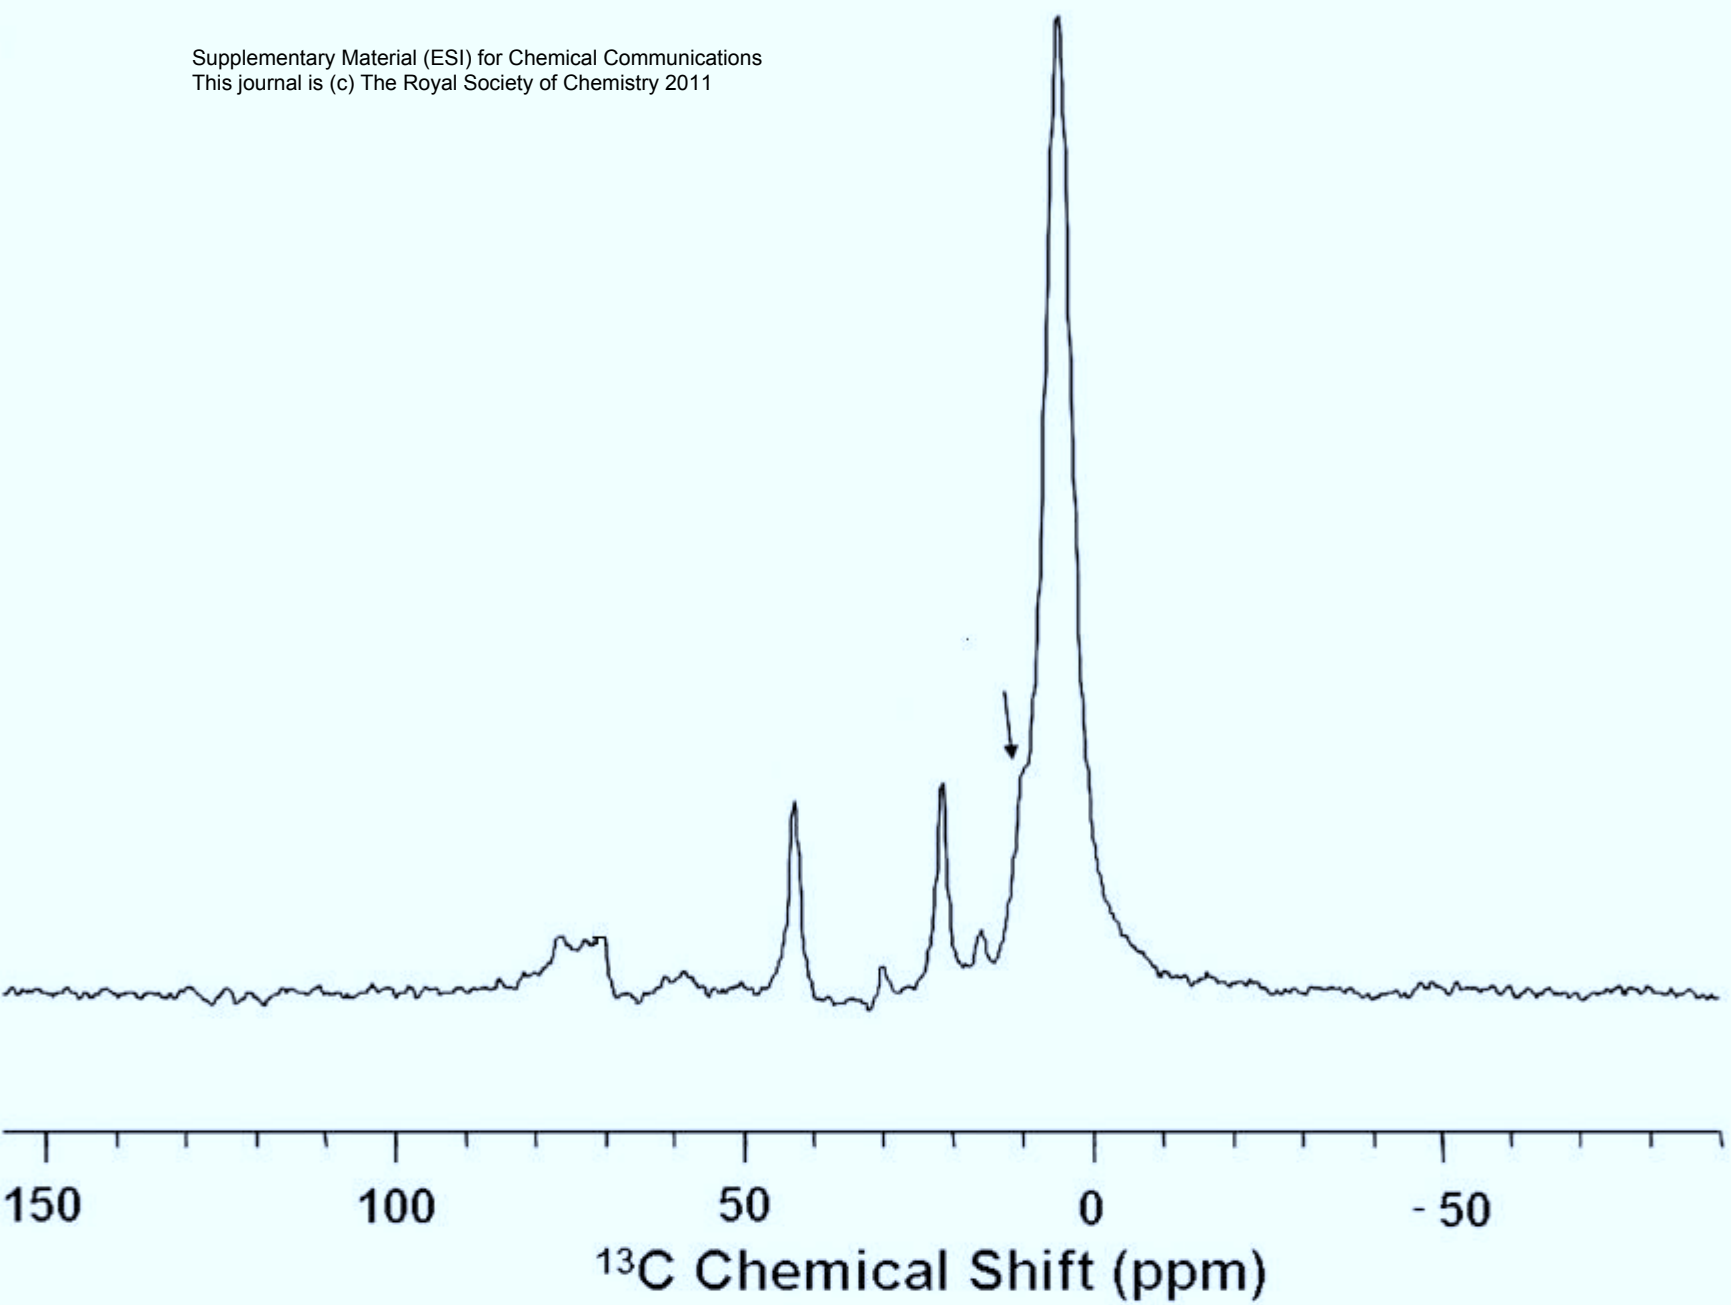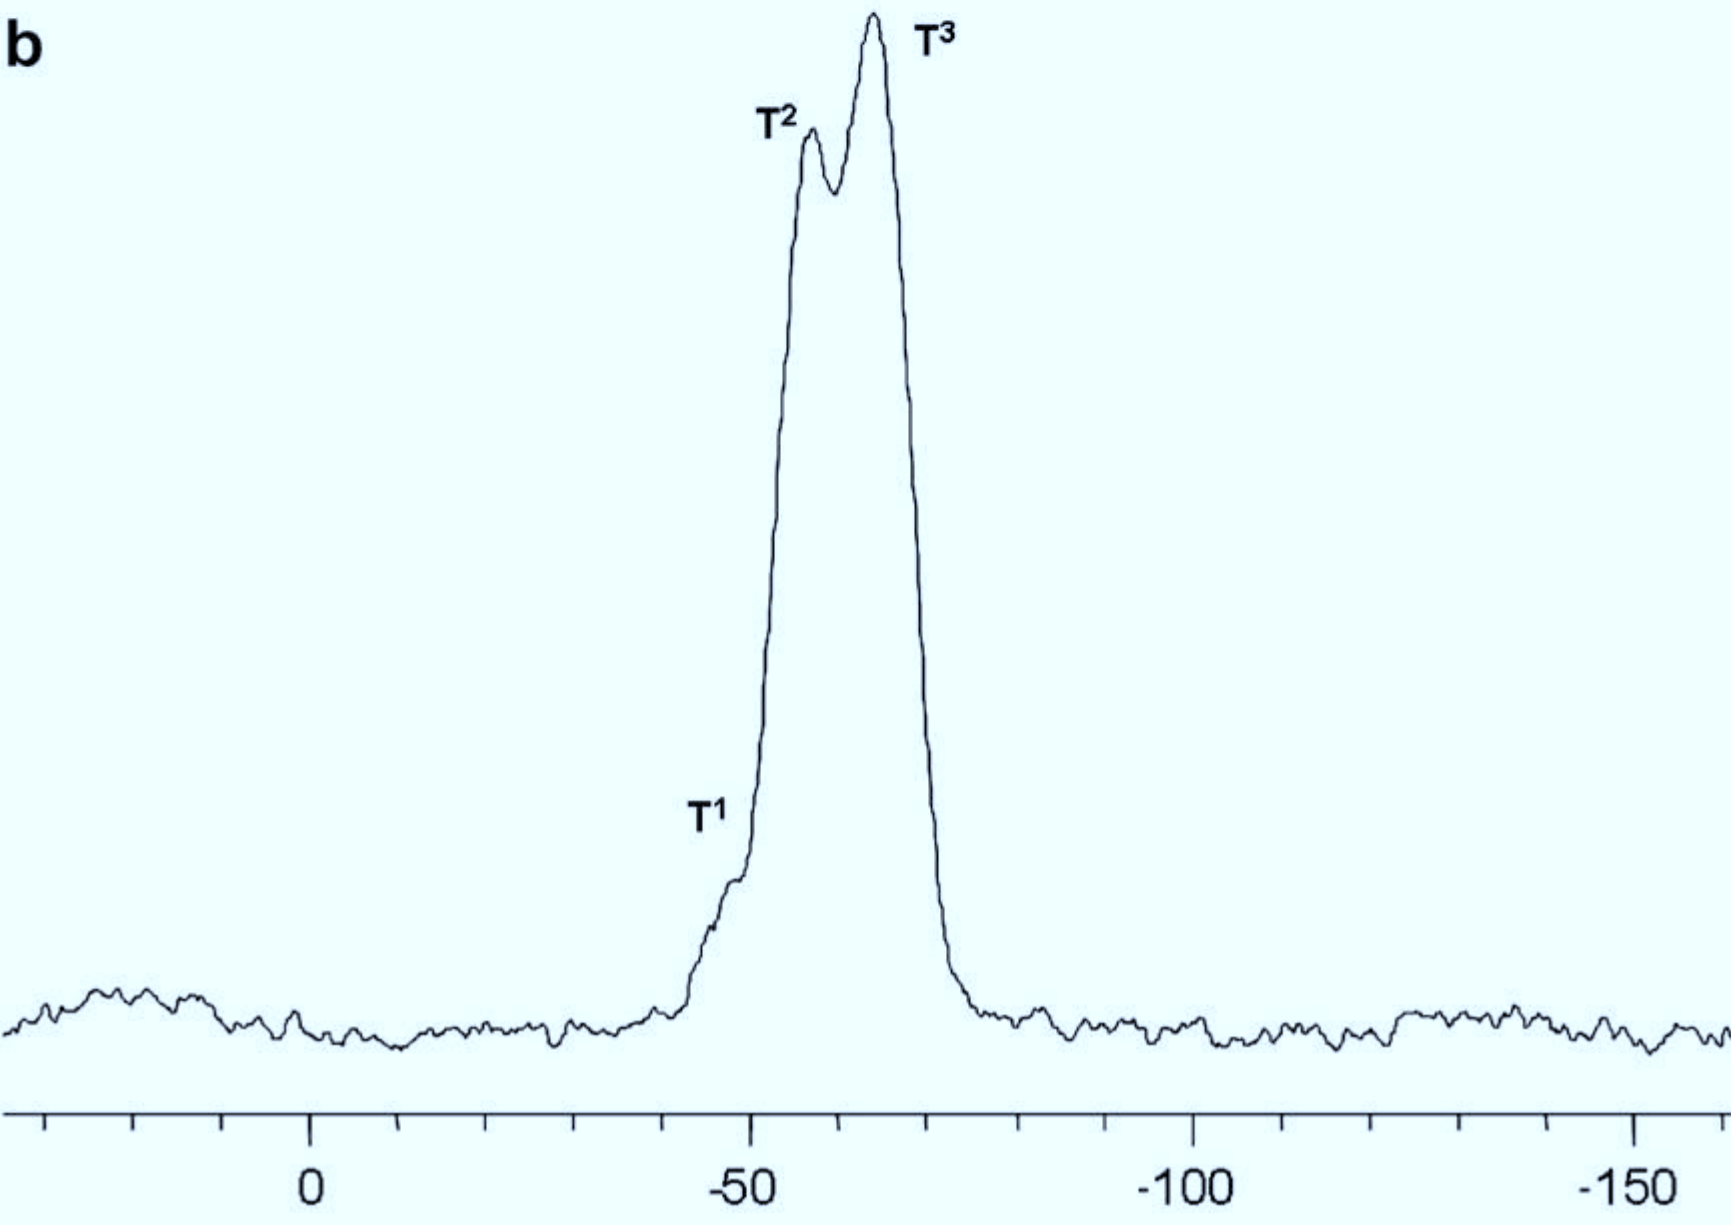

Supplement: c0cc01941k.pdf [file c0cc01941k.pdf]
